# Supplementary material for: NeuroCORD: A Language Model to Facilitate COVID-19-Associated Neurological Disorder Studies
Source: MDPI journal article supplement (doi:10.3390/ijerph19169974), 2022-08-12
Supplement: s1 [file s1]

**Table S1.** Relevant ratio based on keywords-based search.

| TEXT LEVEL | RELEVANT | TOTAL   | EST. RELEVANT RATIO |
|------------|----------|---------|---------------------|
| TITLE      | 447      | 529,397 | 0.1%                |
| ABSTRACTS  | 1,691    | 385,194 | 0.5%                |
| FULL TEXTS | 3,427    | 186,530 | 2%                  |

**Table S2.** Input processing approach optimization result.

| Datasets            | Category         | Abstract     | Summary | Sentences | Sentence<br>(Consensus) |
|---------------------|------------------|--------------|---------|-----------|-------------------------|
| Training            | Sample Size      | 2,561        | 2,561   | 20,244    |                         |
| (Before 2020-12-31) | 10-fold CV (ACC) | <b>0.972</b> | 0.939   | 0.890     |                         |
| Testing             | Sample Size      | 819          | 819     | 7,328     | 819                     |
| (After 2020-12-31)  | Testing (ACC)    | <b>0.940</b> | 0.902   | 0.819     | 0.921                   |
