# Supplementary material for: NeuroCORD: A Language Model to Facilitate COVID-19-Associated Neurological Disorder Studies
Source: MDPI journal article supplement (doi:10.3390/ijerph19169974), 2022-08-12
Supplement: s1 [file s1]

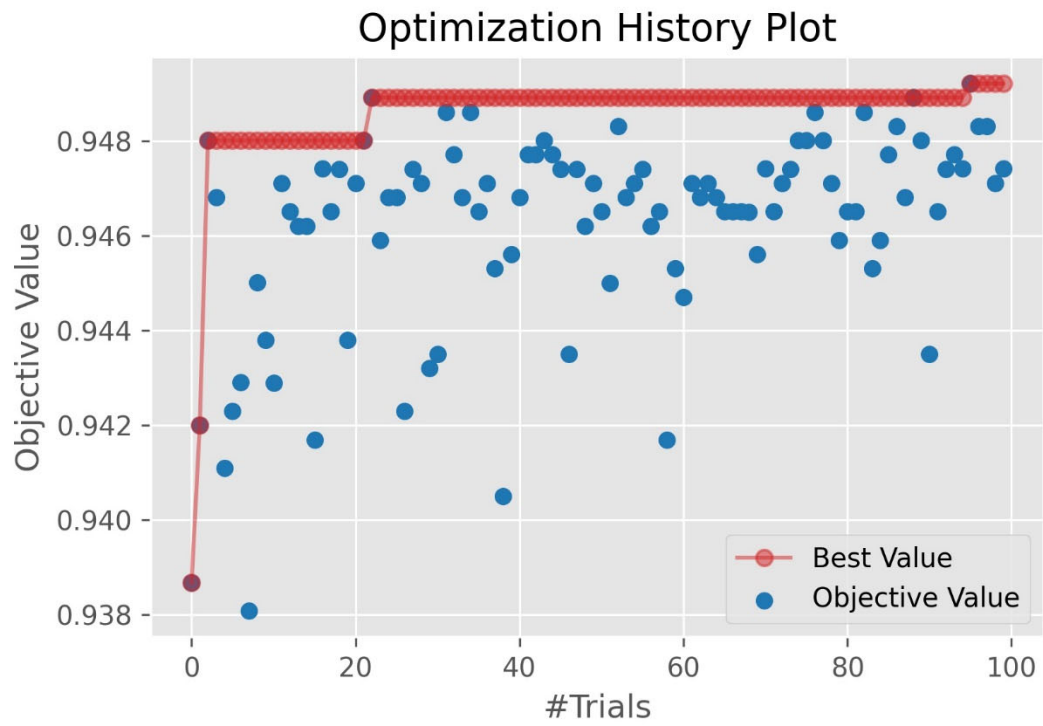

**Figure S1.** Parameter optimization result. X is the number of trails during the optimization process, Y represents the performance in accuracy. The individual dots represent the 10-fold cross scores of each combination tested, with the red line represented the overall best score.
